# Supplementary material for: Climbing the crustal ladder: Magma storage-depth evolution during a volcanic flare-up
Source: PubMed Central journal article supplement — Sci Adv. 2018 Oct 10;4(10):eaap7567. doi: 10.1126/sciadv.aap7567 (PMC6179376; doi:10.1126/sciadv.aap7567), 2018-10-10
Supplement: aap7567_SM.pdf [file aap7567_SM.pdf]

## Supplementary Materials for

### **Climbing the crustal ladder: Magma storage-depth evolution during a volcanic flare-up**

Guilherme A. R. Gualda\*, Darren M. Gravley, Michelle Connor, Brooke Hollmann, Ayla S. Pamukcu, Florence Bégué, Mark S. Ghiorso, Chad D. Deering

\*Corresponding author. Email: [g.gualda@vanderbilt.edu](mailto:g.gualda@vanderbilt.edu)

Published 10 October 2018, *Sci. Adv.* **4**, eaap7567 (2018)  
DOI: 10.1126/sciadv.aap7567

#### **The PDF file includes:**

Table S1. Characteristics of eruptive deposits from the central TVZ analyzed in this study.

Table S2. Magma compositions used for rhyolite-MELTS modeling of energy change associated with crystallization.

Legend for data file S1

#### **Other Supplementary Material for this manuscript includes the following:**

(available at [advances.sciencemag.org/cgi/content/full/4/10/eaap7567/DC1](https://advances.sciencemag.org/cgi/content/full/4/10/eaap7567/DC1))

Data file S1 (Microsoft Excel format). Includes supplementary tables S3 to S5.

**Table S1. Characteristics of eruptive deposits from the central TVZ analyzed in this study.**

| Ignimbrite | Age (ka) | Volume (km <sup>3</sup> ) | Source Caldera/<br>Caldera Complex | Crystal content (%) | Mineral assemblage (qtz + plg + opx) |
|------------|----------|---------------------------|------------------------------------|---------------------|--------------------------------------|
| Ohakuri    | ~240     | ~100                      | Ohakuri                            | < 10                |                                      |
| Mamaku     | ~240     | > 145                     | Rotorua                            | < 10                | ± hbl                                |
| Pokai      | ~300     | ~50                       | Kapenga                            | < 15                |                                      |
| Chimpanzee | ~320-300 | ~50                       | Kapenga                            | < 10                | ± hbl                                |
| Matahina   | ~320     | ~150                      | Okataina                           | < 15                | ± bt ± hbl                           |
| Whakamaru  | ~350     | > 2,000                   | Whakamaru                          | < 35                | + san + bt + hbl                     |

qtz-quartz; plg-plagioclase; opx-orthopyroxene; bt-biotite; hbl-hornblende; san-sanidine

Modified from Gravley *et al.* (23).

**Table S2. Magma compositions used for rhyolite-MELTS modeling of energy change associated with crystallization.**

| Composition*                   | Ohakuri | Mamaku | Pokai | Chimpanzee | Matahina | Whakamaru |
|--------------------------------|---------|--------|-------|------------|----------|-----------|
| SiO <sub>2</sub>               | 77.1    | 76.9   | 76.3  | 75.3       | 77.3     | 75.9      |
| TiO <sub>2</sub>               | 0.15    | 0.15   | 0.15  | 0.20       | 0.12     | 0.16      |
| Al <sub>2</sub> O <sub>3</sub> | 12.8    | 13.1   | 13.3  | 13.9       | 13.1     | 13.8      |
| FeO                            | 1.32    | 1.27   | 1.48  | 1.73       | 1.17     | 1.34      |
| MnO                            | 0.06    | 0.04   | 0.06  | 0.07       | 0.04     | 0.04      |
| MgO                            | 0.13    | 0.10   | 0.11  | 0.15       | 0.20     | 0.13      |
| CaO                            | 0.82    | 0.73   | 0.85  | 1.14       | 0.86     | 1.06      |
| Na <sub>2</sub> O              | 3.53    | 3.96   | 3.82  | 3.86       | 3.45     | 3.16      |
| K <sub>2</sub> O               | 4.03    | 3.73   | 3.84  | 3.63       | 3.82     | 4.38      |
| P <sub>2</sub> O <sub>5</sub>  | 0.02    | 0.02   | 0.03  | 0.03       | 0.01     | 0.02      |
| Total                          | 100.0   | 100.0  | 100.0 | 100.0      | 100.0    | 100.0     |
| P (MPa) <sup>§</sup>           | 74      | 111    | 132   | 228        | 130      | 79        |

\* Compositions determined from data in Gravley *et al.* (23)

<sup>§</sup> Pressures used are based on results from this study for the corresponding unit

**Data file S1. Includes supplementary tables S3 to S5.**
